# Supplementary material
Source: publisher site journal article supplement (https://www.spandidos-publications.com/8418/downloadSupplementary)
Supplement: Supplementary file 1 [file downloadSupplementary]

## Sheet: Sheet1
Table SI. Patient clinical information.
GEO accession no.	Sample source	Sample age, years	Sample sex
GSM34379	Normal	69	Female
GSM34383	Normal	58	Male
GSM34385	Normal	32	Female
GSM34388	Normal	46	Male
GSM34391	Normal	58	Male
GSM34393	Osteoarthritis	60	Female
GSM34394	Osteoarthritis	58	Female
GSM34395	Osteoarthritis	86	Female
GSM34396	Osteoarthritis	69	Female
GSM34397	Osteoarthritis	68	Female
GSM303522	Normal	53	Male
GSM303523	Normal	29	Female
GSM303525	Normal	17	Male
GSM303531	Normal	39	Male
GSM303533	Normal	36	Male
GSM302859	Normal	61	Male
GSM302864	Normal	64	Male
GSM302866	Normal	88	Female
GSM302870	Normal	65	Male
GSM302876	Osteoarthritis	77	Female
GSM302930	Osteoarthritis	76	Female
GSM302880	Osteoarthritis	71	Female
GSM303370	Osteoarthritis	66	Female
GSM303326	Osteoarthritis	61	Female
GSM303341	Osteoarthritis	75	Female
GSM303356	Osteoarthritis	78	Male
GSM303358	Osteoarthritis	64	Male
GSM303360	Osteoarthritis	71	Female
GSM303362	Osteoarthritis	80	Female
GSM898470	Osteoarthritis	71	Female
GSM899010	Osteoarthritis	73	Female
GSM899011	Osteoarthritis	65	Female
GSM899012	Osteoarthritis	51	Female
GSM899013	Osteoarthritis	56	Male
GSM1248763	Normal	59	Male
GSM1248764	Normal	35	Female
GSM1248765	Normal	35	Female
GSM1248766	Normal	41	Male
GSM1248767	Normal	22	Female
GSM1248789	Osteoarthritis	55	Female
GSM1248790	Osteoarthritis	68	Male
GSM1248791	Osteoarthritis	66	Male
GSM1248792	Osteoarthritis	68	Male
GSM1248793	Osteoarthritis	63	Female
GSM1248794	Osteoarthritis	65	Male
GSM1248795	Osteoarthritis	71	Female
GSM1248796	Osteoarthritis	60	Female
GSM1248797	Osteoarthritis	63	Female
GSM1248798	Osteoarthritis	83	Female
GSM1248799	Osteoarthritis	77	Female
GSM1248800	Osteoarthritis	52	Male
GSM1248801	Osteoarthritis	74	Male
GSM1248802	Osteoarthritis	68	Male
GSM1248803	Osteoarthritis	68	Female
GSM1248804	Osteoarthritis	69	Male
GSM1248805	Osteoarthritis	89	Male
GSM1248806	Osteoarthritis	68	Female
GSM1248807	Osteoarthritis	76	Female
GSM1248808	Osteoarthritis	81	Male
GSM1332201	Normal	NA	NA
GSM1332202	Normal	NA	NA
GSM1332203	Normal	NA	NA
GSM1332204	Normal	NA	NA
GSM1332205	Normal	NA	NA
GSM1332206	Normal	NA	NA
GSM1332207	Normal	NA	NA
GSM1332208	Normal	NA	NA
GSM1332209	Normal	NA	NA
GSM1332210	Normal	NA	NA
GSM1332211	Osteoarthritis	NA	NA
GSM1332212	Osteoarthritis	NA	NA
GSM1332213	Osteoarthritis	NA	NA
GSM1332214	Osteoarthritis	NA	NA
GSM1332215	Osteoarthritis	NA	NA
GSM1332216	Osteoarthritis	NA	NA
GSM1332217	Osteoarthritis	NA	NA
GSM1332218	Osteoarthritis	NA	NA
GSM1332219	Osteoarthritis	NA	NA
GSM1332220	Osteoarthritis	NA	NA
GSM1337304	Normal	61	Male
GSM1337305	Normal	64	Male
GSM1337306	Normal	78	Female
GSM1337307	Normal	65	Male
GSM1337308	Normal	53	Male
GSM1337309	Normal	68	Male
GSM1337310	Normal	29	Female
GSM1337311	Normal	17	Male
GSM1337312	Normal	39	Male
GSM1337313	Normal	36	Male
GSM1337327	Osteoarthritis	77	Female
GSM1337328	Osteoarthritis	71	Female
GSM1337329	Osteoarthritis	76	Female
GSM1337330	Osteoarthritis	61	Female
GSM1337331	Osteoarthritis	75	Female
GSM1337332	Osteoarthritis	78	Male
GSM1337333	Osteoarthritis	69	Male
GSM1337334	Osteoarthritis	71	Female
GSM1337335	Osteoarthritis	80	Female
GSM1337336	Osteoarthritis	66	Female
GSM2183532	Normal	NA	NA
GSM2183533	Normal	NA	NA
GSM2183534	Normal	NA	NA
GSM2183535	Normal	NA	NA
GSM2183536	Normal	NA	NA
GSM2183537	Normal	NA	NA
GSM2183538	Normal	NA	NA
GSM2183539	Osteoarthritis	NA	NA
GSM2183540	Osteoarthritis	NA	NA
GSM2183541	Osteoarthritis	NA	NA
GSM2183542	Osteoarthritis	NA	NA
GSM2183543	Osteoarthritis	NA	NA
GSM2183544	Osteoarthritis	NA	NA
GSM2183545	Osteoarthritis	NA	NA
GSM2183546	Osteoarthritis	NA	NA
GSM2183547	Osteoarthritis	NA	NA
GSM2183548	Osteoarthritis	NA	NA
GSM3316962	Normal	37	Female
GSM3316963	Normal	45	Male
GSM3316964	Normal	62	Female
GSM3316965	Normal	58	Female
GSM3316966	Normal	31	Female
GSM3316967	Normal	53	Male
GSM3316968	Normal	50	Male
GSM3316969	Normal	65	Female
GSM3316970	Normal	53	Male
GSM3316971	Normal	43	Male
GSM3316972	Normal	40	Male
GSM3316973	Normal	53	Male
GSM3316974	Osteoarthritis	57	Male
GSM3316975	Osteoarthritis	64	Female
GSM3316976	Osteoarthritis	53	Female
GSM3316977	Osteoarthritis	62	Female
GSM3316978	Osteoarthritis	80	Male
GSM3316979	Osteoarthritis	67	Female
GSM3316980	Osteoarthritis	70	Female
GSM3316981	Osteoarthritis	64	Female
GSM3316982	Osteoarthritis	61	Male
GSM3316983	Osteoarthritis	62	Female
GSM3316984	Osteoarthritis	79	Female
GSM3316985	Osteoarthritis	64	Female
GSM5176138	Normal	NA	NA
GSM5176139	Normal	NA	NA
GSM5176140	Normal	NA	NA
GSM5176141	Normal	NA	NA
GSM5176142	Normal	NA	NA
GSM5176143	Osteoarthritis	NA	NA
GSM5176144	Osteoarthritis	NA	NA
GSM5176145	Osteoarthritis	NA	NA
GSM5176146	Osteoarthritis	NA	NA
GSM5176147	Osteoarthritis	NA	NA
GSM5176148	Osteoarthritis	NA	NA
GEO, Gene Expression Omnibus; NA, not available.
